# Supplementary material
Source: Springer Nature journal article supplement (https://www.springermedizin.de/resource/supplementary/12888_2013_1665_MOESM3_ESM.pdf/9481080)
Supplement: MOESM3 [file 9481080]

Additional file 3: Table S3. Inter-rater agreement for diagnoses given in two MINI assessments

Diagnoses assessed by the second MINI rater

| Diagnoses assessed by the first MINI rater | Diagnoses assessed by the second MINI rater |    |          |          |    |          |    |          |          |
|--------------------------------------------|---------------------------------------------|----|----------|----------|----|----------|----|----------|----------|
|                                            | 1.                                          | 2. | 3.       | 4.       | 5. | 6.       | 7. | 8.       | 9.       |
| 1. Major depressive episode, current       |                                             |    |          |          |    |          |    |          | 1        |
| 2. Major depressive episode, recurrent     | 2                                           |    |          |          |    |          |    | 1        |          |
| 3. Social phobia                           |                                             |    | <u>2</u> |          |    |          |    |          |          |
| 4. Panic disorder                          |                                             |    |          | <u>1</u> |    |          |    |          |          |
| 5. Alcohol dependence and abuse            |                                             |    |          |          |    |          |    |          | 1        |
| 6. Drug dependence and abuse               |                                             |    |          |          |    | <u>1</u> |    |          |          |
| 7. Psychotic disorders                     |                                             |    |          |          |    |          |    |          |          |
| 8. Dissocial personality disorder          |                                             |    |          |          |    |          | 1  | <u>1</u> |          |
| 9. No diagnosis                            |                                             |    |          |          |    |          |    |          | <u>2</u> |

The table includes only the diagnoses that were applied by the assessors. The vertical axis represents the diagnoses in the initial MINI assessment. The horizontal axis represents the diagnoses given by the second MINI rater. The numbers in the cells show the frequency of each combination of diagnoses. Underlined numbers indicate full agreement.
